# Supplementary material for: Contamination and Risk Assessment of Estrogens in Livestock Manure: A Case Study in Jiangsu Province, China
Source: PubMed Central journal article supplement (PMC5800224; doi:10.3390/ijerph15010125), 2018-01-12
Supplement: ijerph-15-00125-s001.pdf [file ijerph-15-00125-s001.pdf]

**Table S1.** The basic dates of estrogens in livestock manure samples.

| Sample id | E3 ( $\mu\text{g}/\text{kg}$ ) | 17 $\beta$ -E2 ( $\mu\text{g}/\text{kg}$ ) | BPA ( $\mu\text{g}/\text{kg}$ ) | EE2 ( $\mu\text{g}/\text{kg}$ ) |
|-----------|--------------------------------|--------------------------------------------|---------------------------------|---------------------------------|
| H1        | 207.1 $\pm$ 33.7               | ND                                         | 47.2 $\pm$ 8.7                  | 13.4 $\pm$ 1.5                  |
| H2        | 309.0 $\pm$ 14.5               | 227.1 $\pm$ 23.4                           | 23.9 $\pm$ 3.9                  | ND                              |
| H3        | 87.5 $\pm$ 9.1                 | 106.8 $\pm$ 11.1                           | 149.2 $\pm$ 39.2                | 57.5 $\pm$ 9.5                  |
| H4        | 86.6 $\pm$ 7.6                 | 57.8 $\pm$ 4.6                             | 95.4 $\pm$ 13.7                 | 67.5 $\pm$ 19.3                 |
| H5        | ND                             | 17.8 $\pm$ 11.1                            | ND                              | ND                              |
| H6        | 3.6 $\pm$ 2.6                  | 24.2 $\pm$ 3.0                             | 23.6 $\pm$ 1.6                  | ND                              |
| H7        | ND                             | 11.7 $\pm$ 2.6                             | 74.1 $\pm$ 10.1                 | 3.3 $\pm$ 1.2                   |
| H8        | 1764.3 $\pm$ 139.8             | ND                                         | 111.5 $\pm$ 60.0                | ND                              |
| H9        | 23.5 $\pm$ 7.0                 | 3.5 $\pm$ 0.5                              | 5.4 $\pm$ 2.9                   | ND                              |
| H10       | 180.4 $\pm$ 32.6               | 14.6 $\pm$ 1.4                             | 12.7 $\pm$ 7.8                  | 7.2 $\pm$ 4.1                   |
| H11       | 645.2 $\pm$ 114.4              | ND                                         | 53.6 $\pm$ 8.8                  | 14.0 $\pm$ 4.6                  |
| H12       | 170.9 $\pm$ 9.7                | ND                                         | 166.5 $\pm$ 24.4                | 8.6 $\pm$ 8.6                   |
| D1        | 1155.4 $\pm$ 33.2              | 20.1 $\pm$ 5.0                             | 55.0 $\pm$ 9.8                  | 28.6 $\pm$ 3.5                  |
| D2        | ND                             | 17.9 $\pm$ 5.6                             | ND                              | 2.7 $\pm$ 1.6                   |
| D3        | 634.6 $\pm$ 310.8              | ND                                         | 71.7 $\pm$ 15.6                 | ND                              |
| D4        | 881.3 $\pm$ 203.3              | 2.8 $\pm$ 1.8                              | 23.7 $\pm$ 2.3                  | ND                              |
| D5        | 139.2 $\pm$ 51.4               | ND                                         | ND                              | 32.0 $\pm$ 3.8                  |
| D6        | ND                             | 9.5 $\pm$ 1.3                              | 178.9 $\pm$ 38.7                | ND                              |
| D7        | 418.6 $\pm$ 213.8              | ND                                         | ND                              | 6.2 $\pm$ 3.7                   |
| D8        | ND                             | 45.6 $\pm$ 8.9                             | 49.3 $\pm$ 15.7                 | ND                              |
| D9        | ND                             | 8.4 $\pm$ 2.8                              | 25.2 $\pm$ 2.8                  | ND                              |
| D10       | 112.2 $\pm$ 20.9               | 4.3 $\pm$ 0.9                              | 82.8 $\pm$ 24.0                 | 43.4 $\pm$ 8.4                  |

|     |              |              |              |             |
|-----|--------------|--------------|--------------|-------------|
| S1  | 518.2 ± 23.6 | 38.6 ± 11.9  | 16.3 ± 5.1   | ND          |
| S2  | 514.5 ± 76.9 | ND           | 13.8 ± 1.4   | 8.0 ± 2.3   |
| S3  | 197.8 ± 26.9 | 47.4 ± 28.0  | ND           | 70.1 ± 33.0 |
| S4  | 174.2 ± 27.3 | 5.2 ± 3.4    | 12.1 ± 0.7   | 45.5 ± 21.7 |
| S5  | 186.4 ± 41.6 | 152.6 ± 11.9 | 33.7 ± 8.6   | ND          |
| S6  | 197.9 ± 40.7 | 30.8 ± 2.9   | 29.2 ± 8.9   | 50.9 ± 19.6 |
| S7  | 298.2 ± 5.9  | ND           | ND           | 7.4 ± 4.7   |
| S8  | 460.2 ± 17.9 | ND           | ND           | ND          |
| S9  | 425.4 ± 52.4 | 201.3 ± 22.4 | 361.8 ± 39.1 | 43.9 ± 26.7 |
| C1  | ND           | 2.2 ± 1.9    | ND           | ND          |
| C2  | ND           | 30.5 ± 1.0   | ND           | 22.2 ± 3.4  |
| C3  | ND           | 86.7 ± 5.0   | ND           | 44.3 ± 2.8  |
| C4  | ND           | 73.9 ± 9.8   | ND           | ND          |
| C5  | 95.8 ± 8.9   | 44.9 ± 10.0  | 33.3 ± 4.5   | 11.4 ± 2.4  |
| C6  | 240.9 ± 70.3 | ND           | 22.3 ± 1.1   | ND          |
| C7  | ND           | ND           | 19.5 ± 6.4   | ND          |
| C8  | ND           | 42.0 ± 3.9   | 31.9 ± 8.4   | ND          |
| C9  | ND           | 19.8 ± 1.1   | 9.6 ± 1.1    | 33.6 ± 7.1  |
| C10 | ND           | 88.3 ± 27.9  | ND           | 106.3 ± 5.3 |

ND means under detection limit. H1-12 represents 1-12 sampling sites for henneries; D1-10 represents 1-10 sampling sites for duck farms; C1-10 represents 1-10 sampling sites for cow farms; and S1-9 represents 1-9 sampling sites for swine farms. E3: estriol, 17β-E2: 17β-estradiol, BPA: bisphenol A, EE2: 17α-ethinyloestradiol.
